# Supplementary material for: Kinetic, isotherm and mechanism studies of organic dye adsorption on poly(4,4′-oxybisbenzenamine) and copolymer of poly(4,4′-oxybisbenzenamine-pyrrole) macro-nanoparticles synthesized by multifunctional carbon dots
Source: Royal Society of Chemistry journal article supplement (doi:10.1039/c8nj05300f), 2018-12-12
Supplement: c8nj05300f1.pdf [file c8nj05300f1.pdf]

# **Kinetics, isotherm and mechanism studies of organic dyes adsorption on poly (4, 4'-oxybisbenzenamine) and copolymer of poly (4, 4'-oxybisbenzenamine-pyrrole) macro-nanoparticles synthesized by multifunctional carbon dot**

*Moorthy Maruthapandi<sup>1</sup>, John H. T. Luong<sup>2</sup>, Aharon Gedanken<sup>1\*</sup>*

<sup>1</sup>Bar-Ilan Institute for Nanotechnology and Advanced Materials, Department of Chemistry, Bar-Ilan University, Ramat-Gan 52900, Israel

<sup>2</sup>School of Chemistry, University College Cork, Ireland

\* Corresponding authors: [gedanken@mail.biu.ac.il](mailto:gedanken@mail.biu.ac.il), Fax: +972-3-7384053; Tel: +972-3-5318315

## **Supporting Information**

**Table 1:** Peak identification in the IR absorption frequency region of POBBA and COP (before and after their adsorption with a dye) and the corresponding functional groups

| <b>POBBA</b>                                          | <b>Major functional groups</b>   | <b>COP</b>                                            | <b>Major functional groups</b>        |
|-------------------------------------------------------|----------------------------------|-------------------------------------------------------|---------------------------------------|
| <b>Absorption frequency regions (cm<sup>-1</sup>)</b> |                                  | <b>Absorption frequency regions (cm<sup>-1</sup>)</b> |                                       |
| 3424                                                  | N-H (stretching vibration)       | 3351                                                  | N-H (stretching vibration)            |
| 2878                                                  | C-H (stretching vibration)       | 3074                                                  | C=C-H (aromatic stretching vibration) |
| 1498                                                  | C=C (stretching vibration)       | 1605 and 1501                                         | C=C (stretching vibration)            |
| 1327                                                  | C-N (stretching vibration)       | 1340                                                  | C-N (stretching vibration)            |
| 1246                                                  | C-O ether (stretching vibration) | 1246                                                  | C-O ether (stretching vibration)      |

**Adsorption kinetics**  $\ln(q_e - q_t) = \ln(q_e) - k_1 t$  (3)

$$\frac{t}{q_t} = \frac{1}{k_2 q_e^2} + \frac{t}{q_e} \quad (4)$$

Where  $q_t$  and  $q_e$  (mg/g) represent the amount of the organic dye (adsorbed at equilibrium) and  $k_1$  ( $\text{min}^{-1}$ ) is the rate constant of the pseudo-first-order model and  $k_2$  ( $\text{g mg}^{-1} \text{min}^{-1}$ ) is the pseudo-second-order model rate constant.

### **Intraparticle diffusion**

Herein, if the intraparticle diffusion is the rate controlling factor, the uptake of the adsorbate varies with the square root of the adsorption time as follows:

$$q_t = k_i t^{1/2} + C \quad (5)$$

The adsorption steps are relevant with the intercept, which represents the intercept of  $C$  (mg/g) and  $k_i$  ( $\text{mg g}^{-1} \text{min}^{-1/2}$ ) is the diffusion rate constant

### **Langmuir and Freundlich adsorption isotherms**

$$\frac{C_e}{q_e} = \frac{1}{q_0 K_L} + \frac{1}{q_0 C_e} \quad (6)$$

$$\ln q_e = \ln K_F + \frac{1}{n C_e} \quad (7)$$

The SEM micrographs of POBBA and COP after the adsorption of the organic dyes

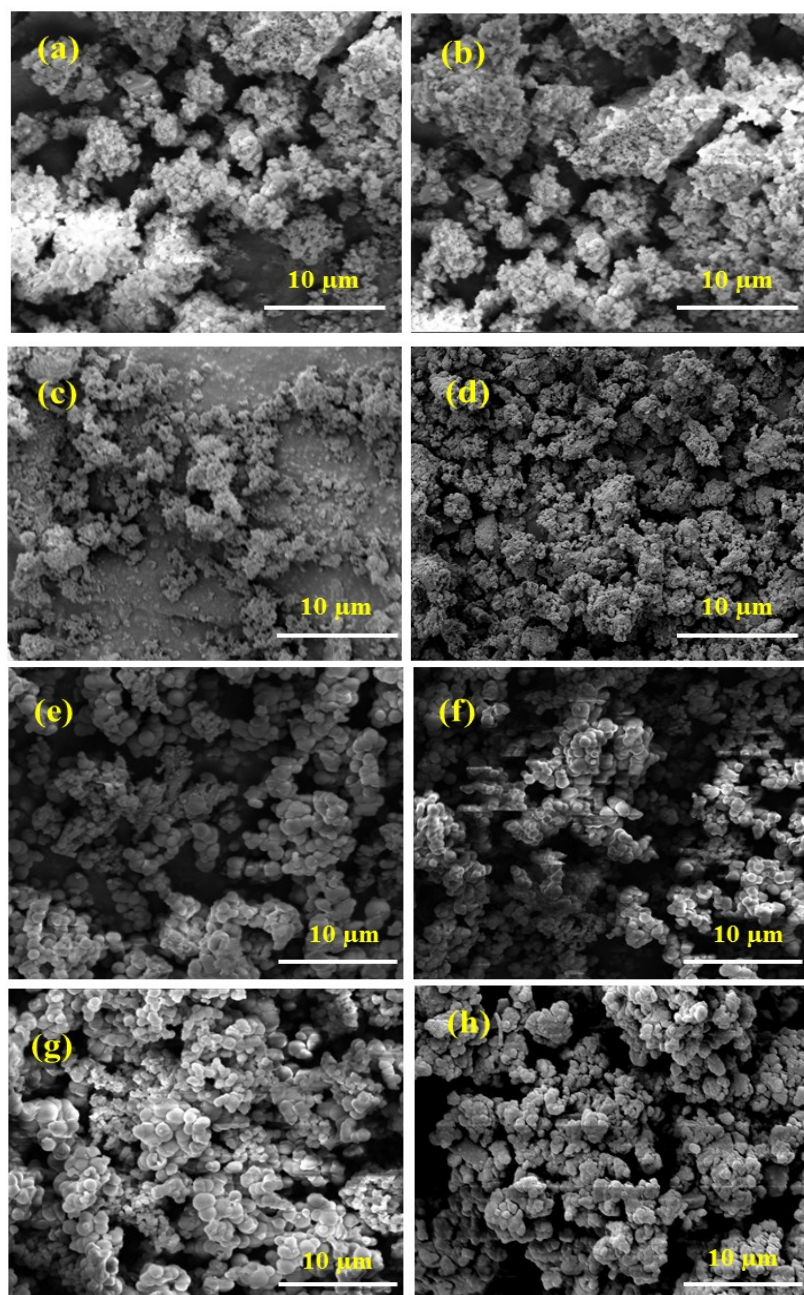

**Figure 1.** (a,b,c and d) are the SEM images of POBBA after the adsorption of C.R, C.V, M.B, and R.B and (e, f, g and h) are SEM images of COP after the adsorption of C.R, C.V, M.B and R.B.
